# Supplementary material
Source: MDPI journal article supplement (https://www.mdpi.com/2410-3896/6/2/18)
Supplement: s1 [file s1]

# Supplementary Materials: Topologically Protected Wormholes in Type-III Weyl Semimetal $\text{Co}_3\text{In}_2\text{X}_2$ ( $\text{X} = \text{S}, \text{Se}$ )

Christopher Sims<sup>1,\*</sup> 

## 1. Landau Levels in the Weyl Regime

First, the type-III Weyl phase must be confirmed to be physically possible. The simple Hamiltonian that describes a 3D Weyl point can be described as:

$$H(k) = \pm vk \cdot \sigma \quad (1)$$

From this formula, a Dirac point can be constructed with two 3D Weyl points of opposite chirality, thus forming the Dirac cone.

$$H = \begin{bmatrix} H_K & 0 \\ 0 & H_{K'} \end{bmatrix} \quad (2)$$

From this formulation, the prototypical type-I Weyl semimetals can be easily constructed and formed. However, magnetism must be introduced in order to tilt the Hamiltonian (and therefore the Weyl cone) so that a critically tilted weyl cone can be formed which leads to a type-III Weyl phase. (where magnetism is added in the  $\hat{z}$  direction in order to allow for the Weyl cone to tilt).

$$H(k) = Ck_z \pm k \cdot \sigma \quad (3)$$

This realizes a Weyl point with +1 or -1 Chern number. The type of Weyl cone depends on the value of the parameter  $C$  where  $C > |1|$  is a type-II Weyl semimetal,  $C < |1|$  is a type-I Weyl semimetal, and  $C = -1$  is a type-III Weyl Semimetal. In the case where magnetic field is applied in the  $\hat{z}$  direction, the Hamiltonian can be rewritten as [1]:

$$E_n = Ck_z \pm \sqrt{k_z^2 + \frac{2n}{l^2}} \quad (4)$$

Where  $l = \frac{eB}{c}^{-\frac{1}{2}}$  is the magnetic parameter. For all figures  $\frac{1}{l} = 0.1$ .

## References

1. Soluyanov, A.A.; Gresch, D.; Wang, Z.; Wu, Q.; Troyer, M.; Dai, X.; Bernevig, B.A. Type-II Weyl semimetals. *Nature* **2015**, 527, 495–498. doi:10.1038/nature15768.
